# Supplementary material
Source: Springer Nature journal article supplement (https://www.springermedizin.de/resource/supplementary/12959_2013_182_MOESM5_ESM.pdf/9569220)

**A**

### Symmetrical vs. adjacent well averaging

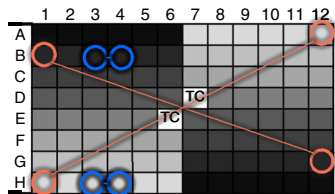**B**

### Advantages of symmetrical layout

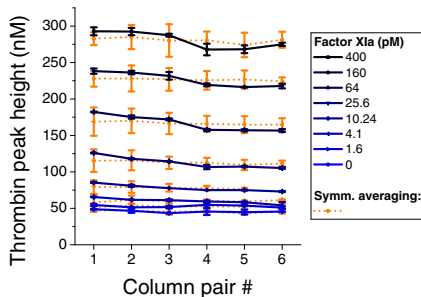**C**

### Adjacent averaging

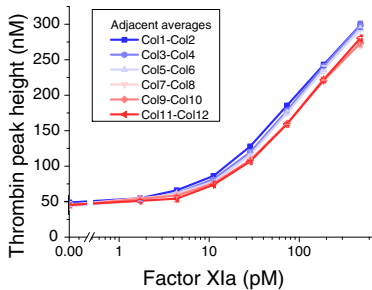**D**

### Symmetrical averaging

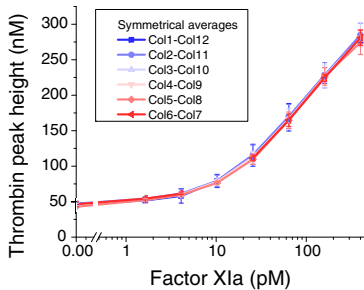

Supplement: MOESM5 [file 9569220]
